# Supplementary material for: The carbonization of polyethyleneimine: facile fabrication of N-doped graphene oxide and graphene quantum dots
Source: Royal Society of Chemistry journal article supplement (doi:10.1039/c5ra25173g), 2015-01-01
Supplement: c5ra25173g1.pdf [file c5ra25173g1.pdf]

## Electronic Supplementary Information

### The carbonization of polyethyleneimine: facile fabrication of N-doped graphene oxide and graphene quantum dots

**Table S1** Elemental analysis results of PEI, the obtained N-GQDs and N-GO.

|        | C (wt%) | N (wt%) | H (wt%) | O (wt%,calculated ) |
|--------|---------|---------|---------|---------------------|
| PEI    | 38.74   | 44.59   | 16.67   |                     |
| N-GQDs | 49.60   | 20.85   | 5.27    | 24.28               |
| N-GO   | 54.94   | 19.72   | 3.21    | 22.13               |

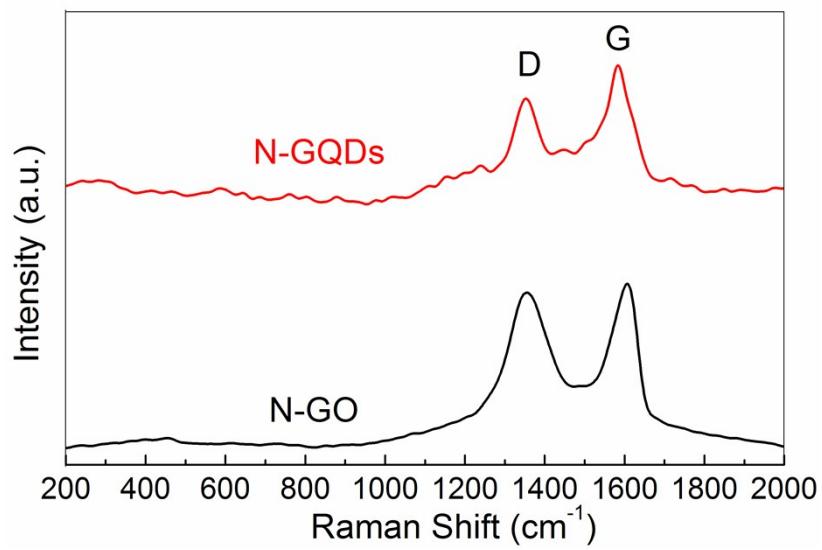

**Fig. S1** Raman spectra of N-GO and N-GQDs.

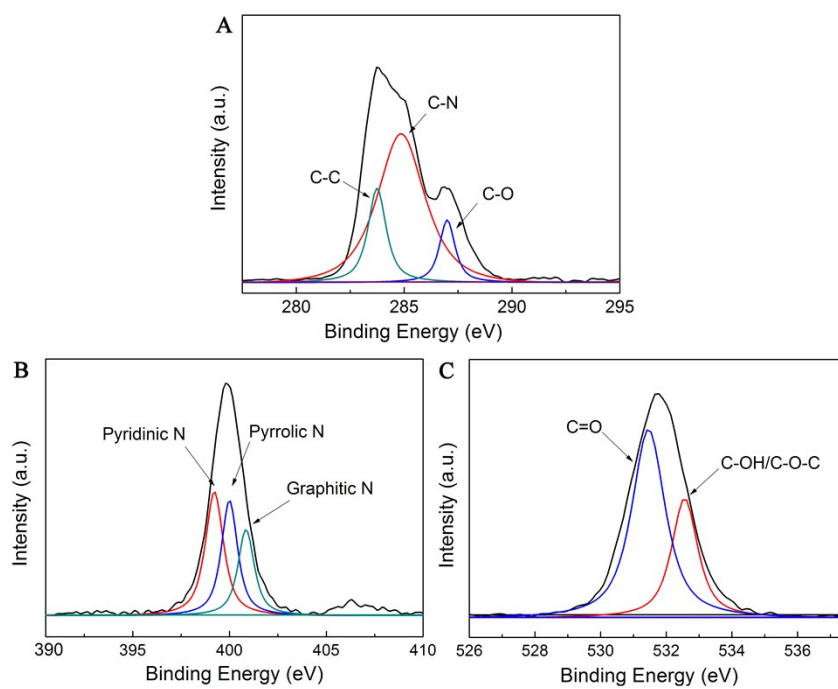

**Fig. S2** High-resolution XPS spectra of N-GO (A) C 1s, (B) N 1s and (C) O 1s.

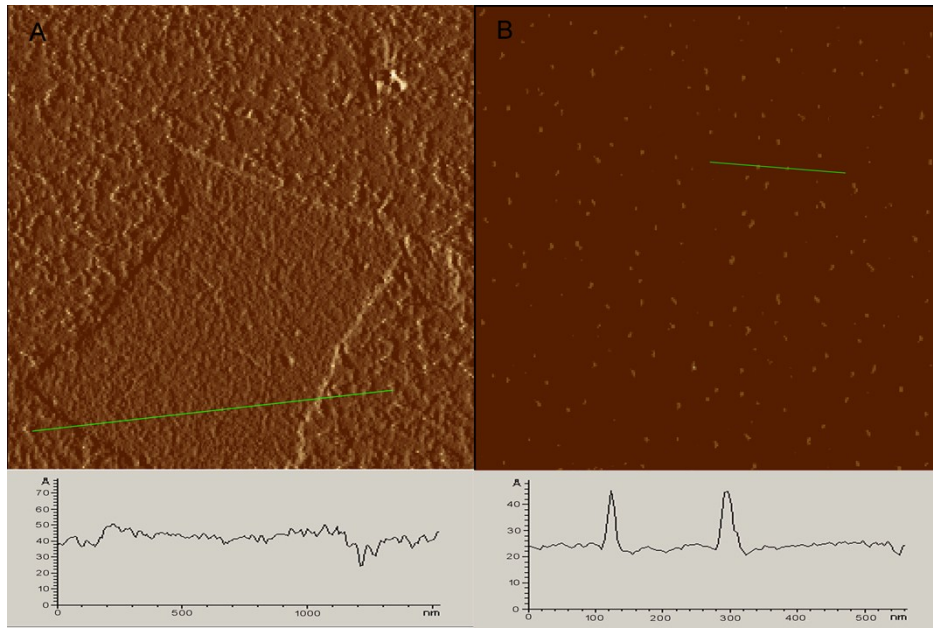

**Fig. S3** AFM images of N-GO (A) and N-GQDs (B).

**Table S2** The comparison of different quantum yield of GQDs prepared by bottom-up method.

| Precursor                            | Synthetic method                         | Quantum yield (%) | Application              | References |
|--------------------------------------|------------------------------------------|-------------------|--------------------------|------------|
| poly(ethylene glycol)<br>/saccharide | Microwave                                | 3.1               | –                        | [1]        |
| Candle soot                          | HNO <sub>3</sub> oxidation               | 7.8               | Bioimaging               | [2]        |
| Citrate                              | carbonized                               | 3                 | –                        | [3]        |
| Ionic liquids                        | Microwave                                | 5.1               | Quercetin<br>sensing     | [4]        |
| Hair fibre                           | H <sub>2</sub> SO <sub>4</sub> treatment | 11.1              | Bioimaging               | [5]        |
| Grass                                | Hydrothermal<br>treatment                | 6.2               | Cu <sup>2+</sup> sensing | [6]        |
| polyethyleneimine                    | carbonized                               | 13.5              | Bioimaging               | This work  |

## References

- 1 H. Zhu, X. L. Wang, Y. L. Li, Z. J. Wang, F. Yang, X. R. Yang, *Chem. Commun.*, 2009, **34**, 118-120.
- 2 S. C. Ray, A. Saha, N. R. Jana, R. J. Sarkar, *Phys. Chem. C*, 2009, **113**, 18546-18551.
- 3 B. Bourlinos, A. Stassinopoulos, D. Anglos, R. Zboril, M. Karakassides, E. P. Giannelis, *Small*, 2008, **4**, 455-458.
- 4 D. L. Xiao, D. H. Yuan, H. He, *Luminescence*, 2013, **140**, 612-615.
- 5 D. Sun, R. Ban, P. H. Zhang, G. H. Wu, J. R. Zhang, J. J. Zhu, *Carbon*, 2013, **64**, 424-434.
- 6 S. Liu, J. Q. Tian, L. Wang, Y. W. Zhang, X. Y. Zhang, Y. L. Qin, Y. L. Luo, A. M. Asiri, A. O. Al-youbi, X. P. Sun, *Adv. Mater.*, 2012, **24**, 2037-2041.
